# Supplementary material
Source: Springer Nature journal article supplement (https://www.springermedizin.de/resource/supplementary/13024_2012_359_MOESM5_ESM.pdf/9643808)

### SH-SY5Y cell

### KG1C cell

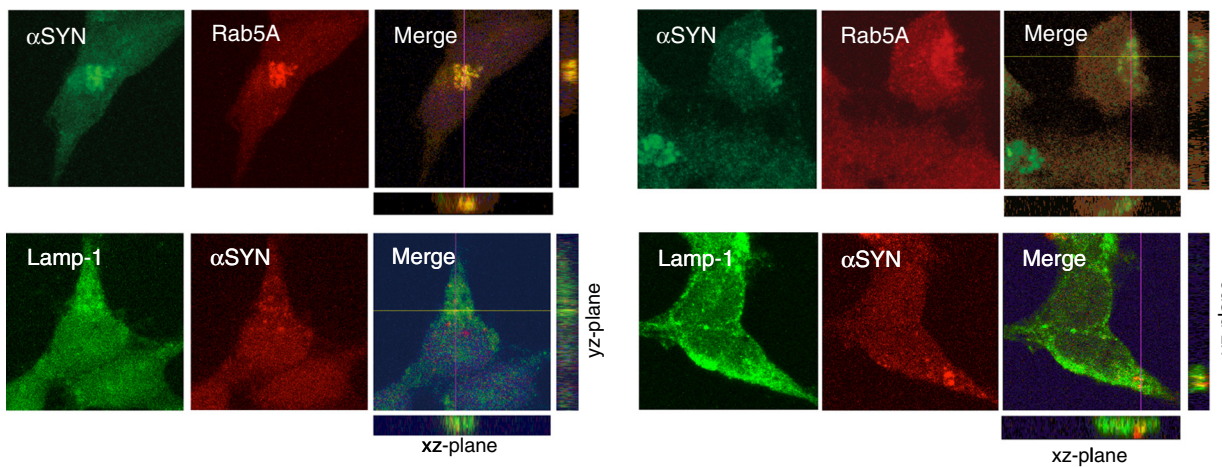

### B

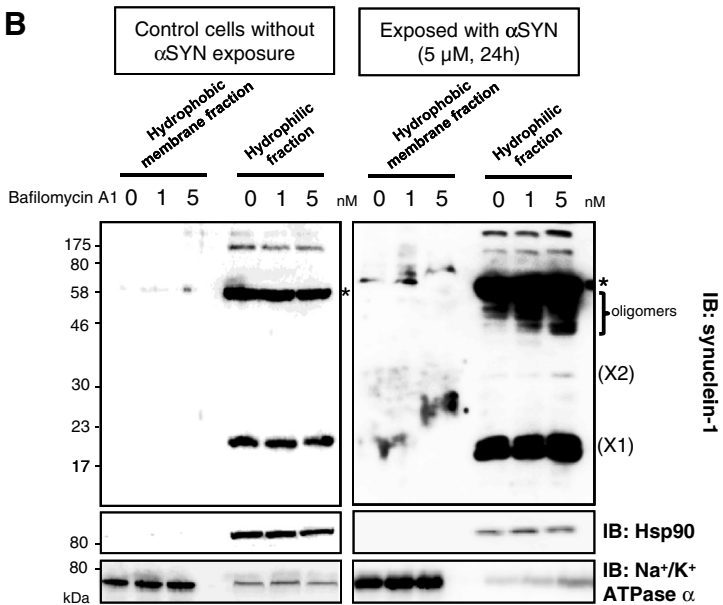

### C

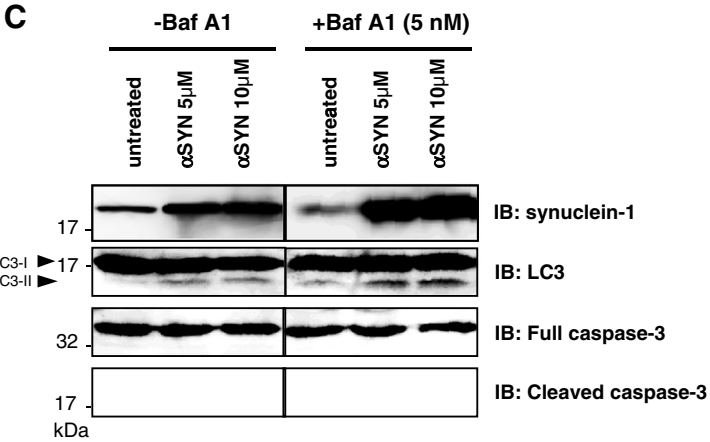

Supplement: MOESM5 [file 9643808]
